# Supplementary material
Source: Springer Nature journal article supplement (https://www.springermedizin.de/resource/supplementary/12889_2010_3117_MOESM1_ESM.pdf/9488262)

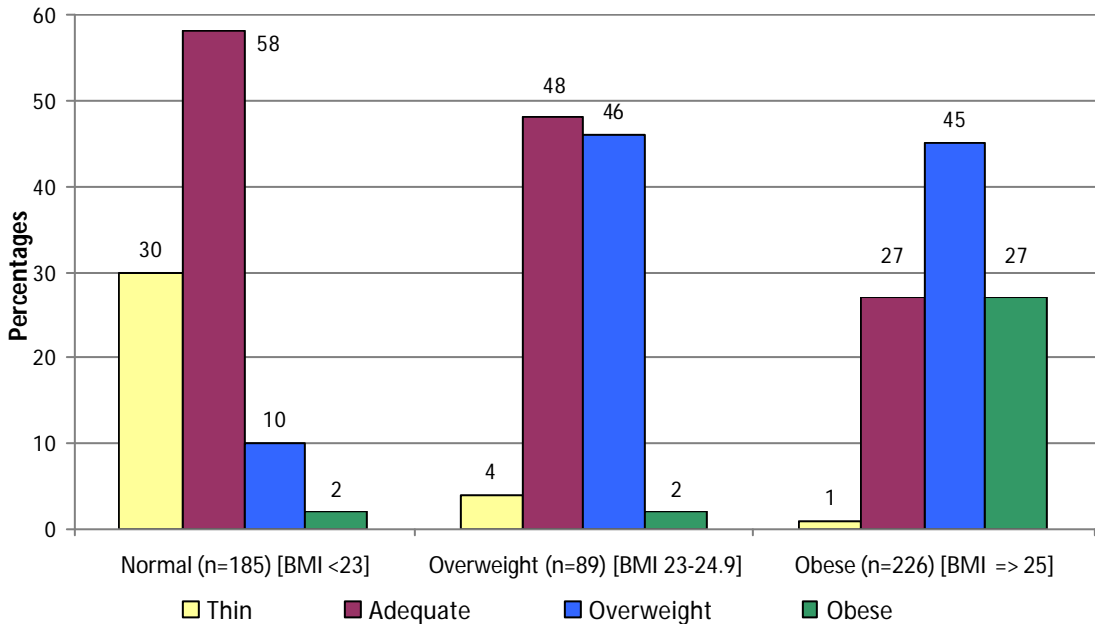

Supplement: MOESM1 [file 9488262]
